# Supplementary material
Source: publisher figshare collection journal article supplement (https://future-science-group.figshare.com/ndownloader/files/30448389)
Supplement: Supplementary file 1 [file 30448389]

**Supplements**

| **Exclusion Criteria** | **Male** | **Female** | **Black** | **NHW** | **Total** |
| --- | --- | --- | --- | --- | --- |
| Data Anomalies |  |  |  |  | 56 |
| Missing FFQ Data | 2070 (42.1) | 2849 (57.9) | 3006 (61.1) | 1913 (38.9) | 4919 |
| Did not complete >15% FFQ | 1253 (48.4) | 1338 (51.6) | 1652 (63.8) | 939 (36.2) | 2591 |
| Implausible caloric intake | 682 (65.8) | 355 (34.2) | 581 (56.0) | 456 (44.0) | 1037 |
| Missing variables: |  |  |  |  |  |
| Education | 2 (20.0) | 8 (80.0) | 3 (30.0) | 7 (70.0) | 10 |
| Smoking | 36 (43.9) | 46 (56.1) | 32 (39.0) | 50 (61.0) | 82 |
| QOL | 65 (59.1) | 45 (40.9) | 33 (30.0) | 77 (70.0) | 110 |
| Mobility | 154 (51.5) | 145 (48.5) | 97 (32.4) | 202 (67.6) | 299 |
| Hypertension | 46 (45.5) | 55 (54.5) | 23 (22.8) | 78 (77.2) | 101 |
| Stroke | 28 (42.4) | 38 (57.6) | 16 (24.2) | 50 (75.8) | 66 |
| Diabetes | 23 (39.7) | 35 (60.3) | 24 (41.4) | 34 (58.6) | 58 |
| CVD | 128 (36.8) | 220 (63.2) | 139 (39.9) | 209 (60.1) | 348 |
| Pain | 1972 (43.8) | 2529 (56.2) | 1710 (38.0) | 2791 (62.0) | 4501 |

Supplemental Table 1. Number (% of total) of individuals excluded from the analysis from each sex and race category, based on exclusion criteria.

| **Diet Pattern** | **Race** | | **Sex** | |
| --- | --- | --- | --- | --- |
| *Black* | *NHW* | *Male* | *Female* |
| ***Factor 1 Convenience*** |  |  |  |  |
| *Q1* | 1469 (28.7) | 1686 (15.8) | 1123 (16.1) | 2032 (23.1) |
| *Q2* | 1224 (23.9) | 1932 (18.1) | 1190 (17.0) | 1966 (22.4) |
| *Q3* | 938 (18.4) | 2217 (20.8) | 1372 (19.6) | 1783 (20.3) |
| *Q4* | 783 (15.3) | 2373 (22.3) | 1527 (21.8) | 1629 (18.5) |
| *Q5* | 699 (13.7) | 2456 (23.0) | 1780 (25.5) | 1375 (15.7) |
| ***Factor 2 Plant Based*** |  |  |  |  |
| *Q1* | 791 (15.5) | 2364 (22.2) | 1707 (24.4) | 1448 (16.5) |
| *Q2* | 1020 (20.0) | 2136 (20.0) | 1473 (21.1) | 1683 (19.2) |
| *Q3* | 1053 (20.6) | 2102 (19.7) | 1384 (19.8) | 1771 (20.2) |
| *Q4* | 1066 (20.9) | 2090 (19.6) | 1252 (17.9) | 1904 (21.7) |
| *Q5* | 1183 (23.1) | 1972 (18.5) | 1176 (16.8) | 1979 (22.5) |
| ***Factor 3 Sweets/Fats*** |  |  |  |  |
| *Q1* | 1394 (27.3) | 1761 (16.5) | 1205 (17.2) | 1950 (22.2) |
| *Q2* | 1094 (21.4) | 2062 (19.3) | 1306 (18.7) | 1850 (21.1) |
| *Q3* | 909 (17.8) | 2246 (21.1) | 1398 (20.0) | 1757 (20.0) |
| *Q4* | 869 (17.0) | 2287 (21.5) | 1520 (21.7) | 1636 (18.6) |
| *Q5* | 847 (16.6) | 2308 (21.6) | 1563 (22.4) | 1592 (18.1) |
| ***Factor 4 Southern*** |  |  |  |  |
| *Q1* | 242 (4.7) | 2913 (27.3) | 1211 (17.3) | 1944 (22.1) |
| *Q2* | 561 (11.0) | 2595 (24.3) | 1225 (17.5) | 1931 (22.0) |
| *Q3* | 955 (18.7) | 2200 (20.6) | 1325 (19.0) | 1830 (20.8) |
| *Q4* | 1413 (27.6) | 1743 (16.3) | 1525 (21.8) | 1631 (18.6) |
| *Q5* | 1942 (38.0) | 1213 (11.4) | 1706 (24.4) | 1449 (16.5) |
| ***Factor 5 Alcohol/Salads*** |  |  |  |  |
| *Q1* | 1616 (31.6) | 1539 (14.4) | 1112 (15.9) | 2043 (23.3) |
| *Q2* | 1250 (24.5) | 1906 (17.9) | 1193 (17.1) | 1963 (22.3) |
| *Q3* | 957 (18.7) | 2198 (20.6) | 1394 (19.9) | 1761 (20.1) |
| *Q4* | 729 (14.3) | 2427 (22.8) | 1565 (22.4) | 1591 (18.1) |
| *Q5* | 561 (11.0) | 2594 (24.3) | 1728 (24.7) | 1427 (16.2) |

Supplemental Table 2. Distribution of race (Black/NHW) and sex (male/female) across the dietary pattern quintiles. Q1 indicates the lowest level of adherence to the dietary pattern, and Q5 indicates the highest level of adherence. Figures represent frequency (percent of sample).
